# Supplementary material
Source: MDPI journal article supplement (https://www.mdpi.com/2304-6732/8/5/144)
Supplement: s1 [file s1 › photonics-1192943-supplementary.pdf]

Supplementary materials

# Tumor phantom with incorporated SERS tags: detectability in a turbid medium

**Figure S1**

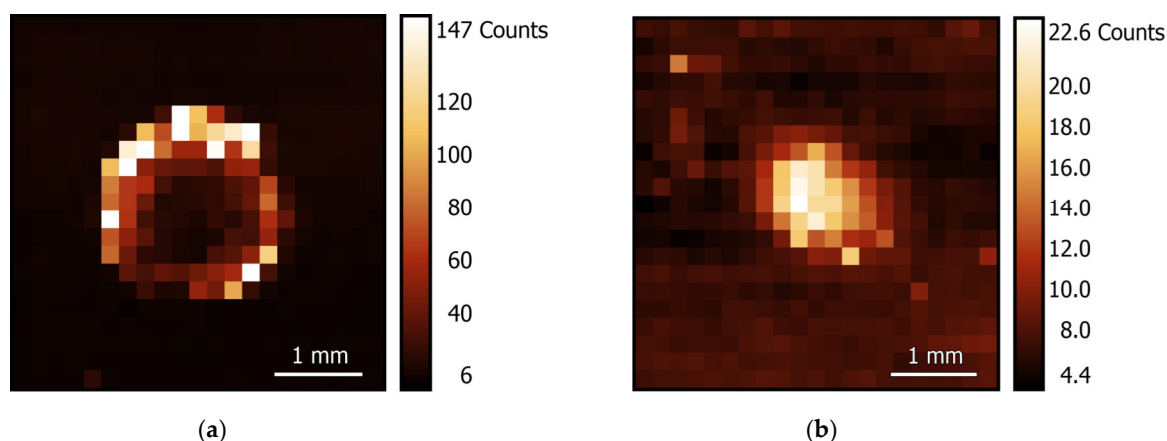

Figure S1. False-color Raman maps of the CA spheres with incorporated Raman reporters placed into medium with scattering coefficient 0 (a), 2 (b)  $\text{cm}^{-1}$ . Color decoding bar shows on the right. Concentrations of incorporated SERS tags are  $2 \times 10^9 \text{ cm}^{-3}$ , gel thickness is 6 mm.

**Figure S2**

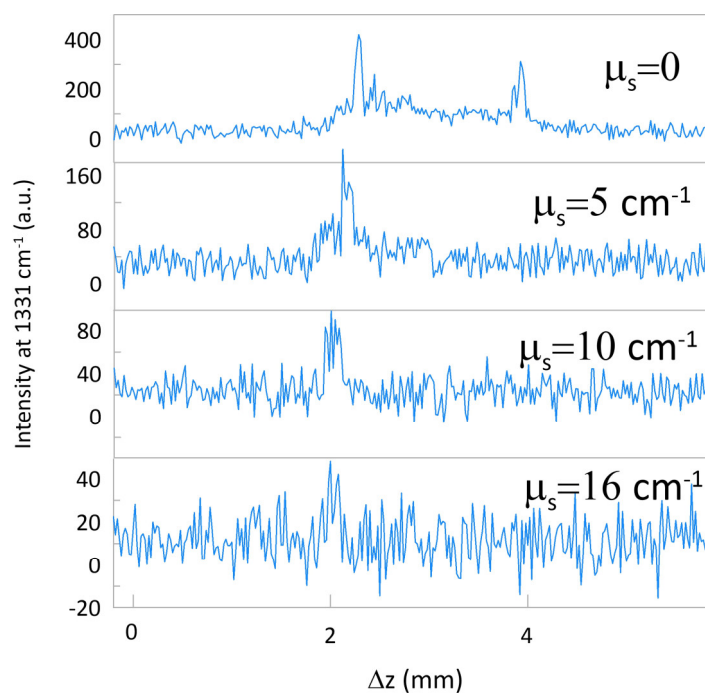

**Figure S2.** The dependence of SERS strongest peak intensity at  $1331\text{ cm}^{-1}$  on the deepness of laser focusing.  $\Delta z=0$  corresponds to top of the agarose gel while  $\Delta z=6\text{ mm}$  corresponds to bottom of the sample. The data for different scattering coefficient of the upper layer from  $\mu_s=0$  to  $16\text{ cm}^{-1}$ .

**Figure S3**

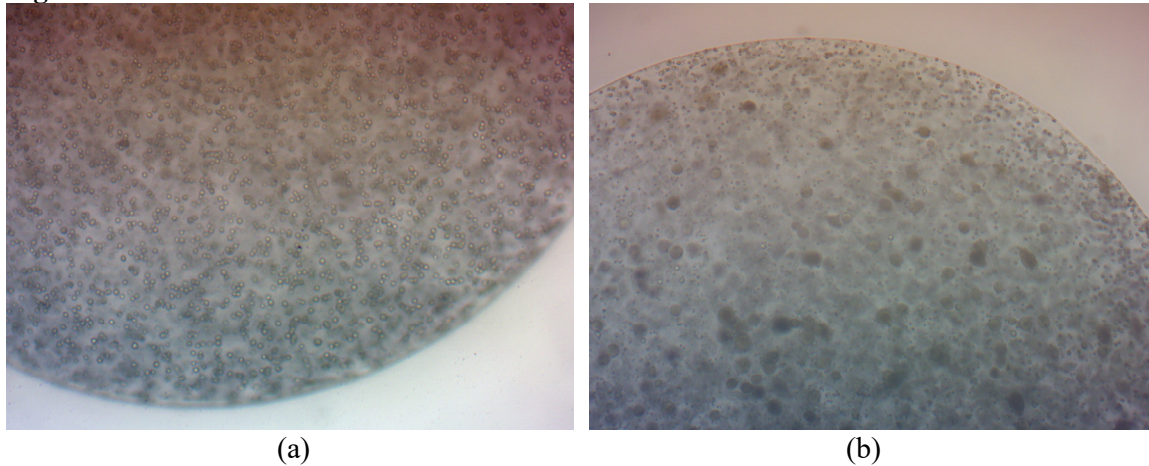

Figure S3. Optical image of the CA spheres with incorporated Raman reporters under 50x (a), 100x (b) magnification. Concentrations of incorporated SERS tags are  $2 \times 10^9\text{ cm}^{-3}$
